# Supplementary material for: New complexes constructed from in situ nitration of (1H-tetrazol-5-yl)phenol: synthesis, structures and properties
Source: Royal Society of Chemistry journal article supplement (doi:10.1039/c7ce00753a), 2017-01-01
Supplement: c7ce00753a1.pdf [file c7ce00753a1.pdf]

## Supporting Information

### New complexes constructed from *in situ* nitration of (1*H*-tetrazol-5-yl)phenol: synthesis, structures and properties

Ceng-Ceng Du<sup>a</sup>, Xin-Fang Wang<sup>a</sup>, Sheng-Bin Zhou<sup>a</sup>, Duo-Zhi Wang<sup>\*a, b</sup> and  
Dianzeng Jia<sup>b</sup>

<sup>a</sup>Key Laboratory of Energy Materials Chemistry, Ministry of Education, Institute of Applied Chemistry, Xinjiang University, Urumqi, 830046 Xinjiang, P. R. China.

<sup>b</sup>College of Chemistry and Chemical Engineering, Xinjiang University, Urumqi 830046, P. R. China.

#### <sup>1</sup>H NMR spectra for 4-(1*H*-tetrazol-5-yl)phenol

<sup>1</sup>H NMR (400 MHz, DMSO)  $\delta$  16.48 (s, 1H), 10.15 (s, 1H), 7.88-7.84 (m, 2H), 6.97-6.94 (m, 2H).

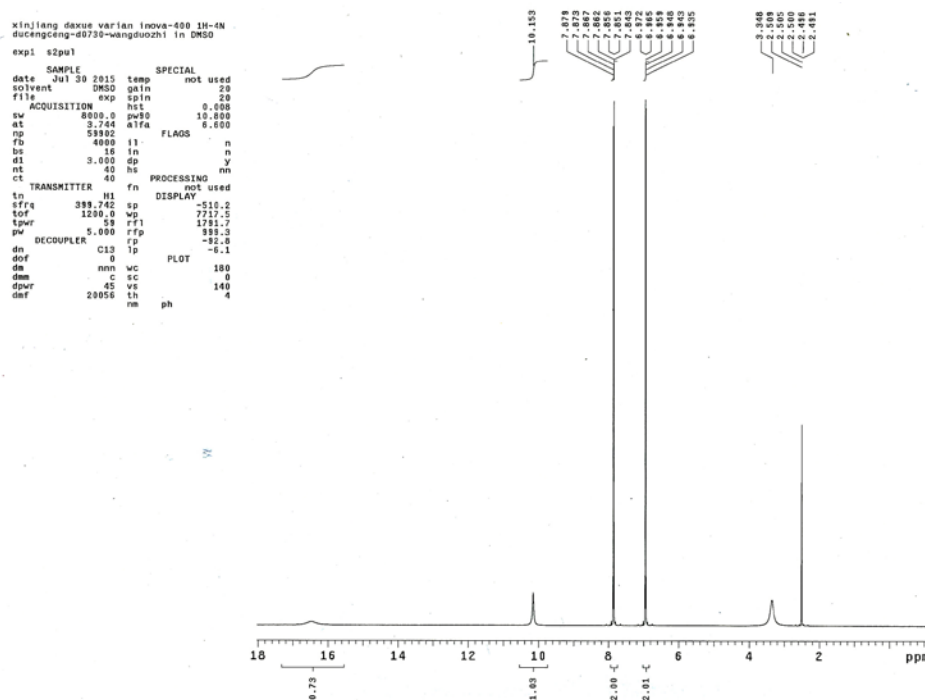

#### <sup>1</sup>H NMR spectra for 3-(1*H*-tetrazol-5-yl)phenol

<sup>1</sup>H NMR (400 MHz, DMSO)  $\delta$  16.78 (s, 1H), 9.95 (s, 1H), 7.49-7.45 (m, 2H), 7.41 (t, *J* = 8.0 Hz, 1H),  
7.00-6.97 (m, 1H).

```

xinjiang daxue varian nova-600 1H-4N
fanjianzhong-M-wangduozhi in DMSO
exp1 s2pu1
SAMPLE SPECIAL
date Oct 22 2014 temp not used
solvent DMSO gain 20
file exp spin 20
ACQUISITION hst 0.000
sw 8000.0 pw90 10.000
at 3.744 alfa 6.000
rg 53902
fb 4000 ll n
ss 16 in n
d1 3.000 dp y
nt 50 hs nm
ct 60
TRANSMITTER fn not used
tn H1 DISPLAY
sfrq 399.742 sp -786.4
tof 1200.0 wp 7895.8
tpwr 59 rfl 786.6
pw 5.000 rfp 0
DECOUPLER C13 fp -93.3
dn 0 lp -7.8
dof nnn wc PLOT 180
dm c sc 0
dppr 45 vs 427
dntf 20055 th nm ph 2

```

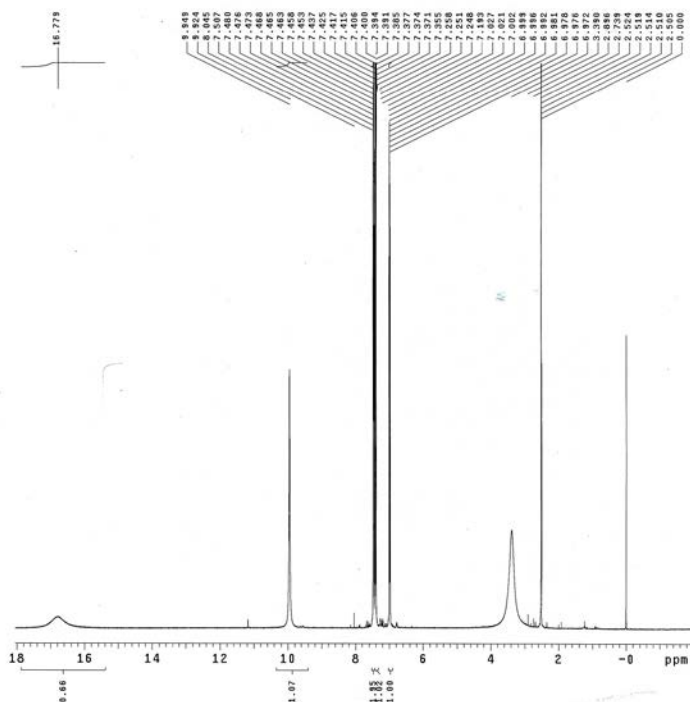

### <sup>1</sup>H NMR spectra for 2-(1*H*-tetrazol-5-yl)phenol

<sup>1</sup>H NMR (400 MHz, DMSO)  $\delta$  15.92 (s, 1H), 10.94 (s, 1H), 8.00–7.98 (m, 1H), 7.43-7.40 (m, 1H), , 7.07 (dd,  $J = 8.3, 0.8$  Hz, 1H), 7.02-6.98 (m, 1H)

```

xinjiang daxue varian nova-600 1H-4N
occ-wangduozhi in DMSO
exp1 s2pu1
SAMPLE SPECIAL
date Jan 8 2016 temp not used
solvent DMSO gain 20
file exp spin 20
ACQUISITION hst 0.000
sw 8000.0 pw90 10.000
at 3.744 alfa 6.000
rg 53902
fb 4000 ll n
ss 4 in n
d1 3.000 dp y
nt 60 hs nm
ct 60
TRANSMITTER fn not used
tn H1 DISPLAY
sfrq 399.742 sp -884.1
tof 1200.0 wp 7892.4
tpwr 59 rfl 1790.8
pw 5.000 rfp 985.3
DECOUPLER C13 fp -9.8
dn 0 lp -9.8
dof nnn wc PLOT 180
dm c sc 0
dppr 45 vs 254
dntf 20055 th nm ph 11

```

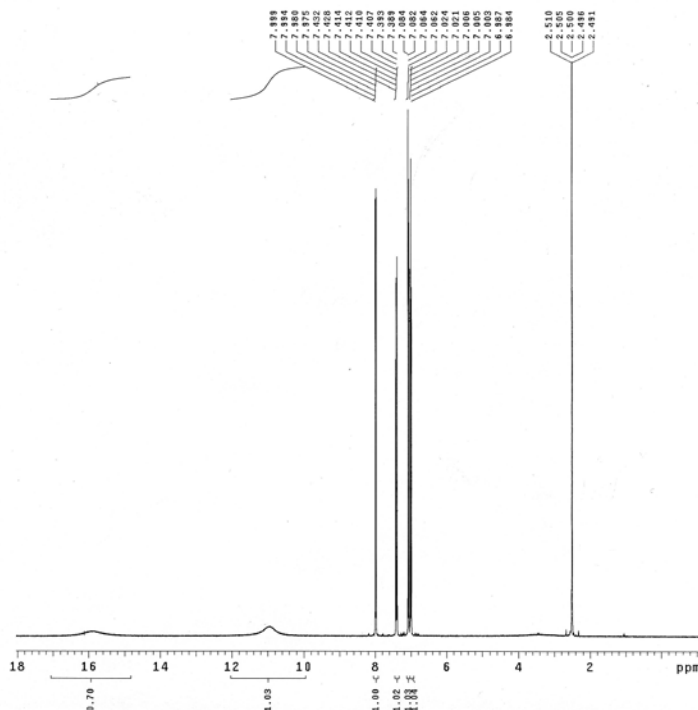

**Fig. S1.** <sup>1</sup>H NMR spectra for three precursors ligands

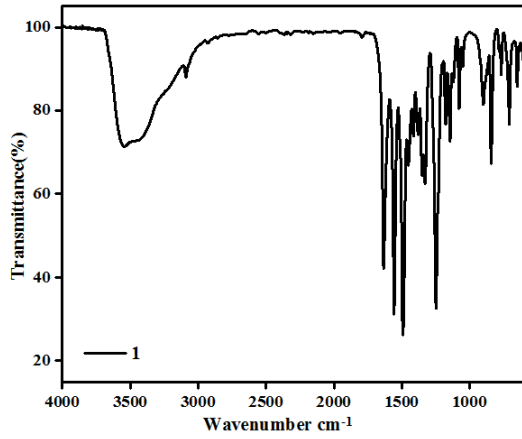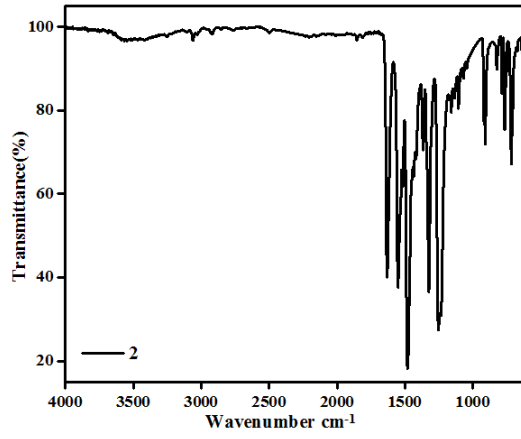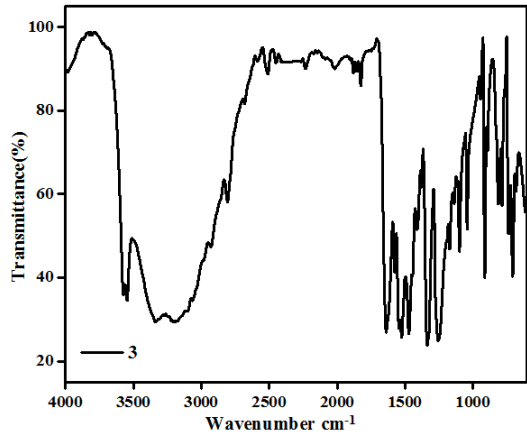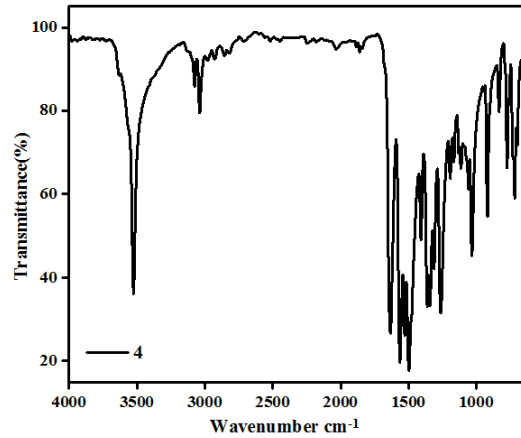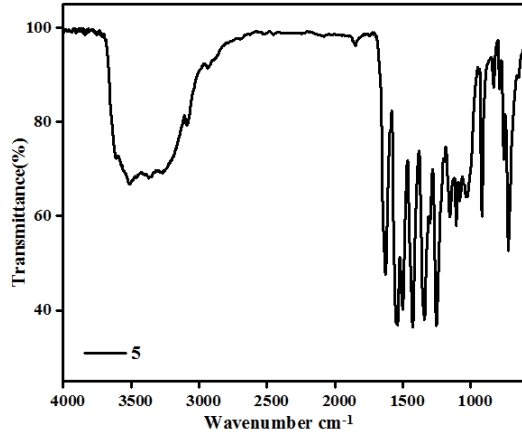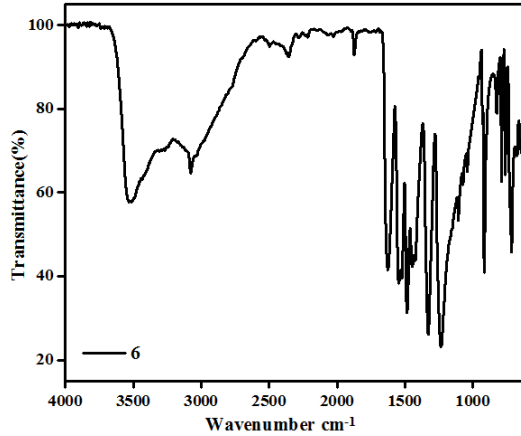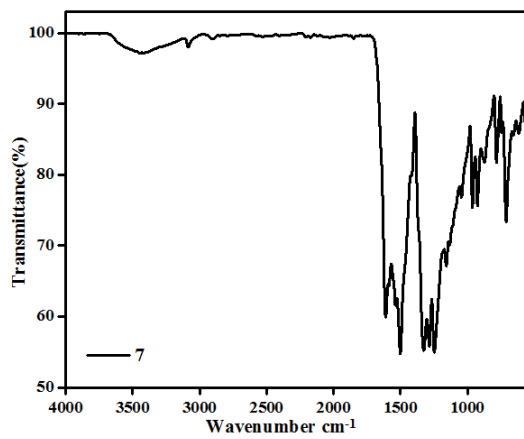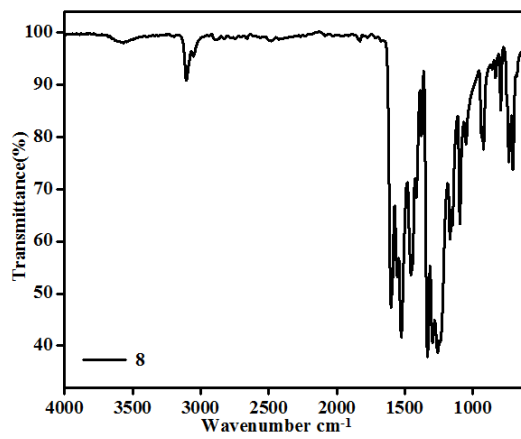

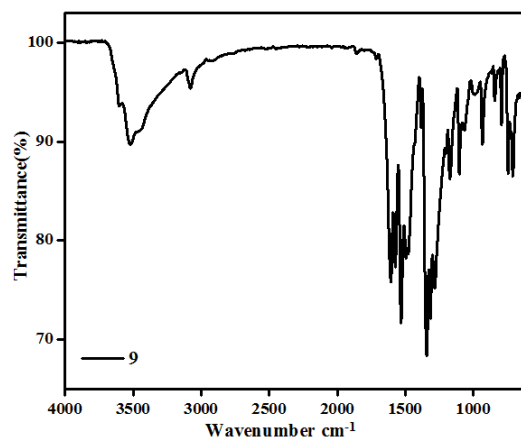

**Fig. S2.** FT-IR spectra of 1-9.

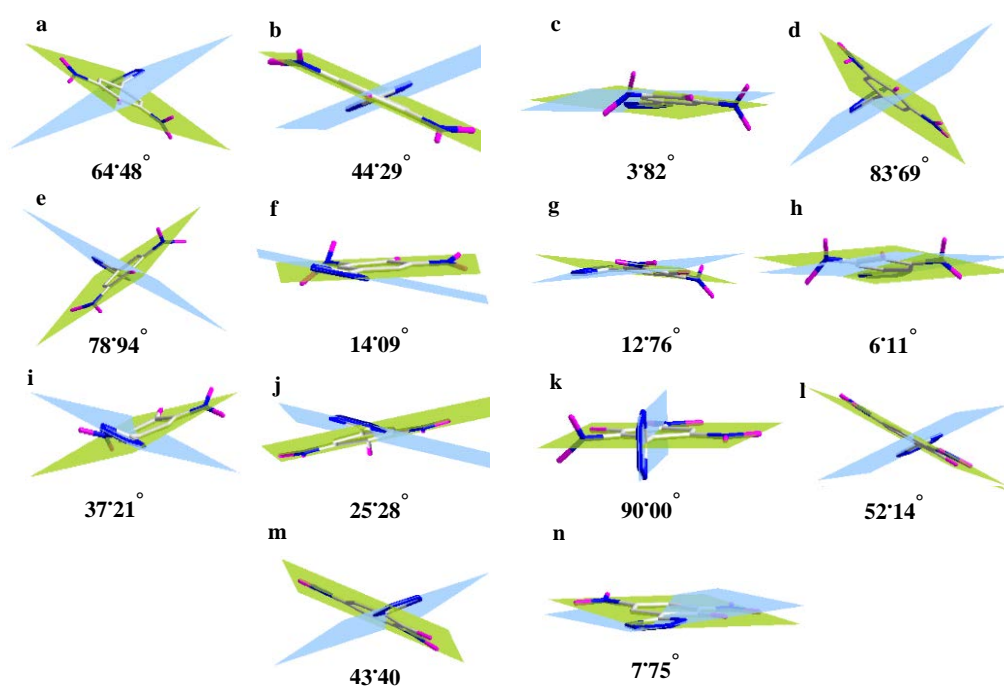

**Fig. S3.** The dihedral angles between the tetrazole ring and the benzene ring in the ligand.

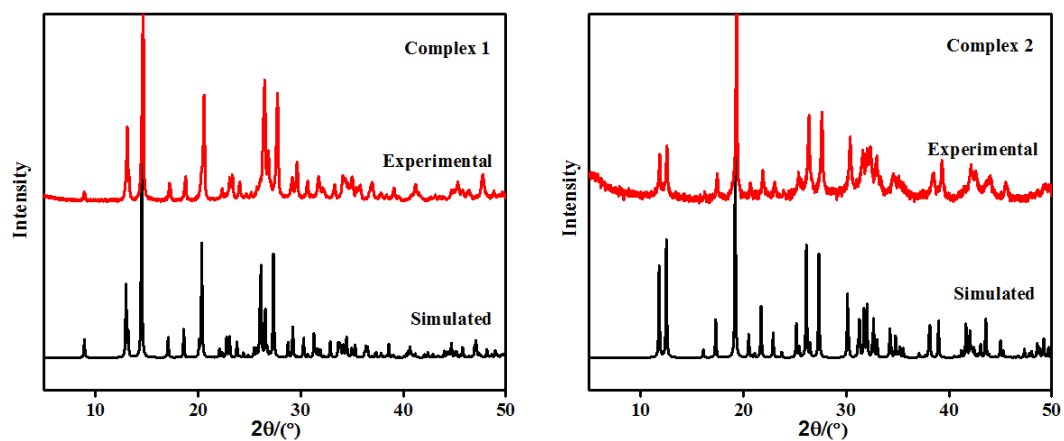

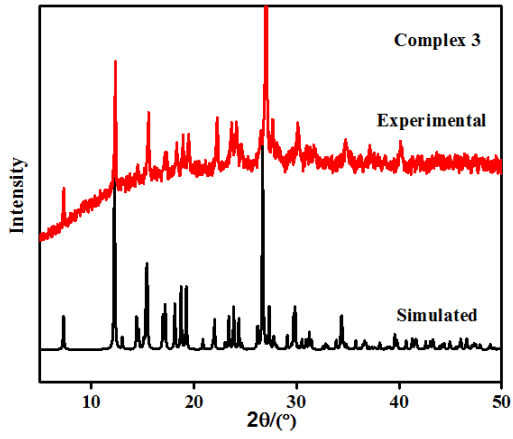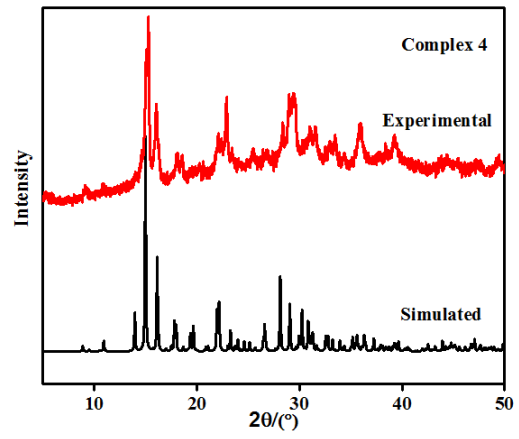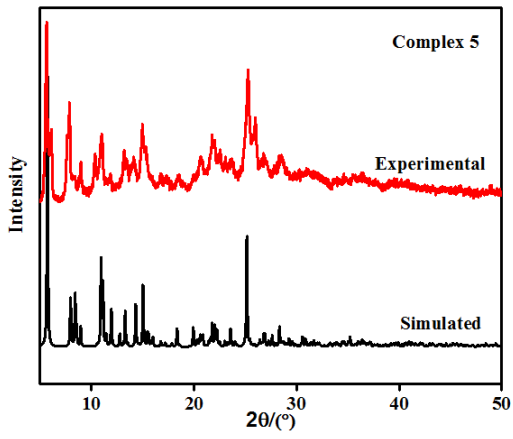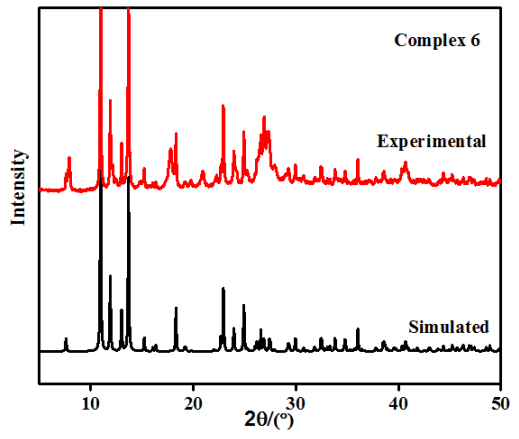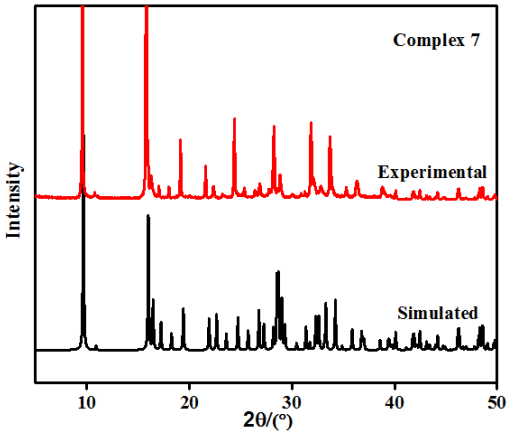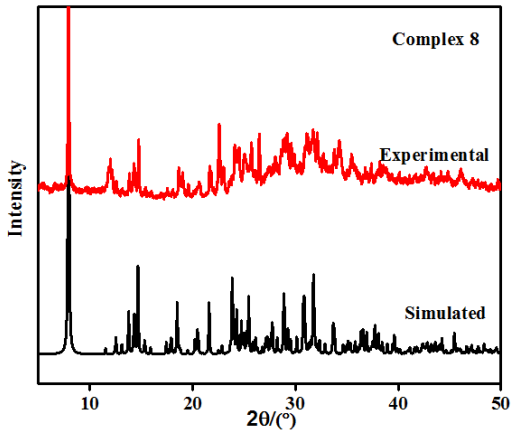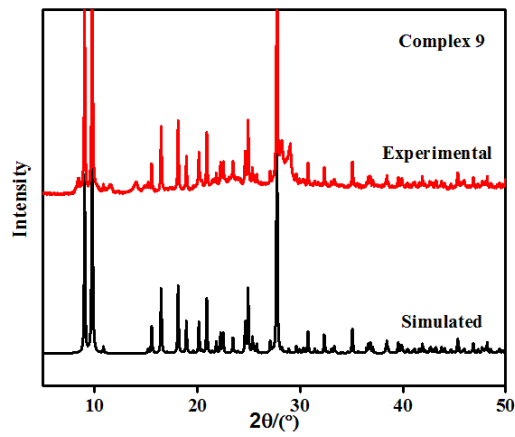

**Fig. S4.** Experimental and simulated PXRD patterns of **1-9**.

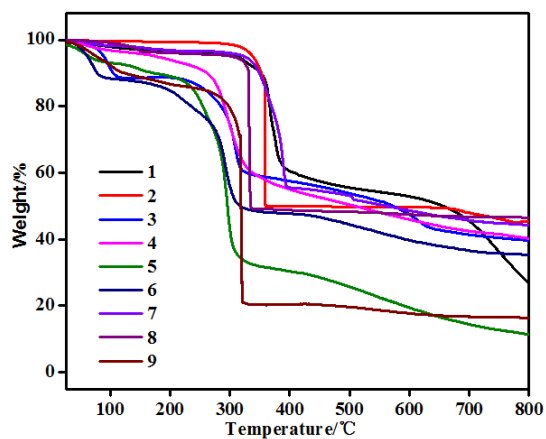

**Fig. S5.** TGA curves of **1-9**.

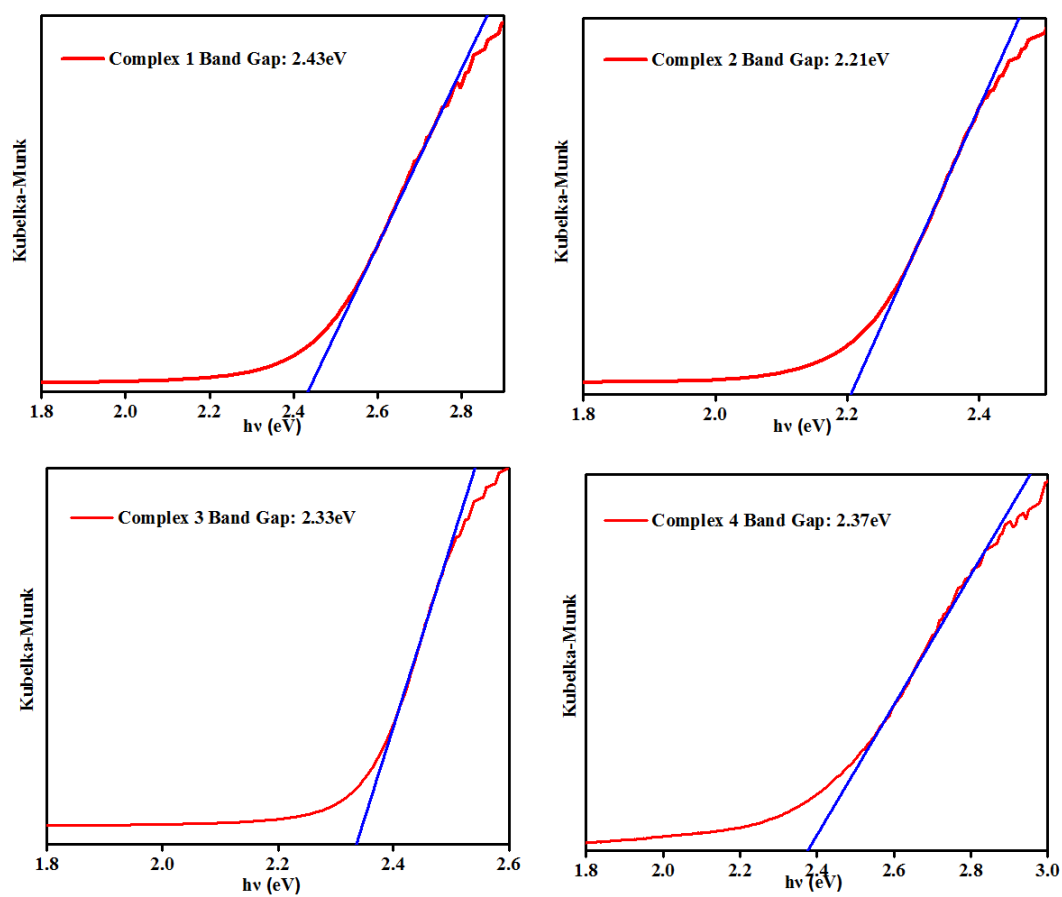

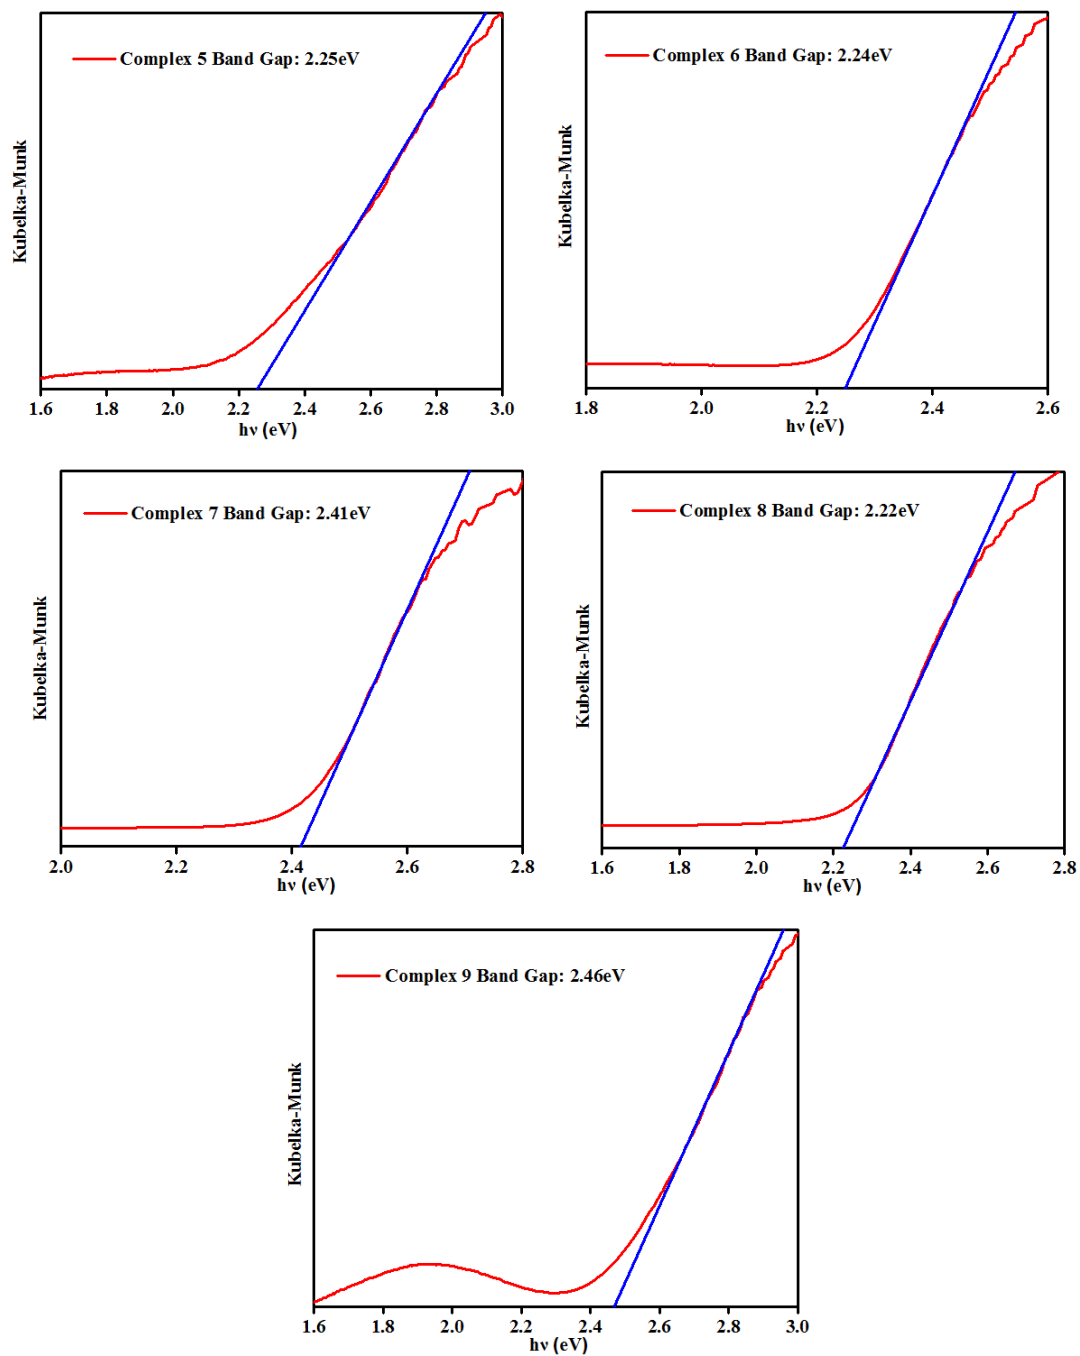

**Fig. S6.** Diffuse reflectance spectra of K–M functions versus energy (eV) of complexes **1-9** at room temperature.

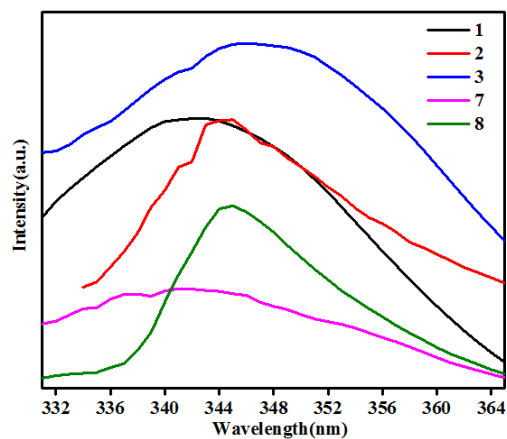

**Fig. S7.** Excitation spectra of **1-3**, **7** and **8** in solid state at room temperature.

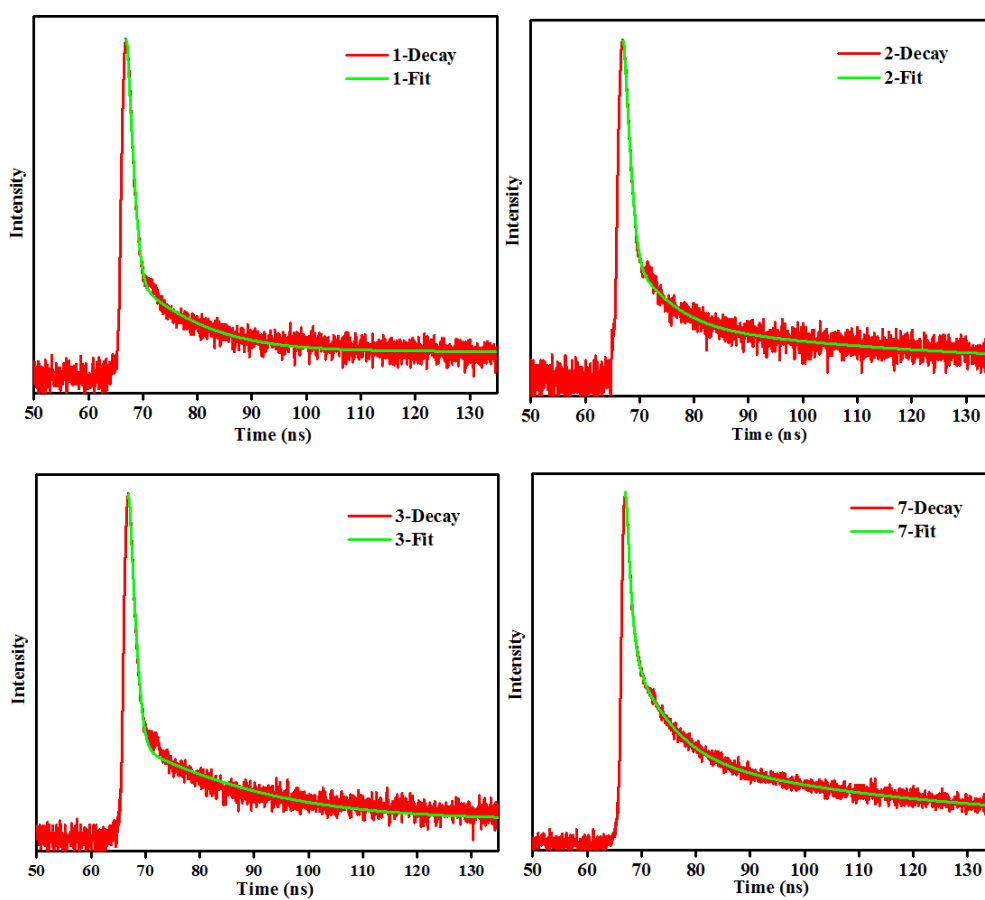



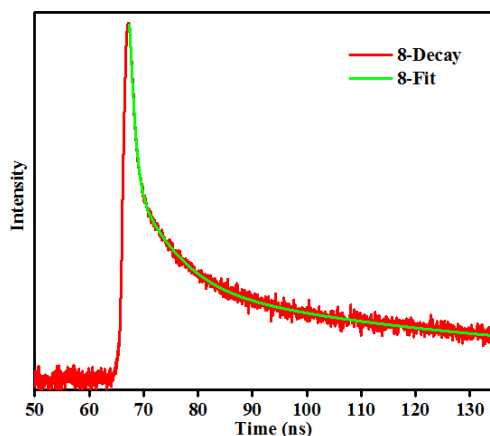

**Fig. S8.** Luminescence decays of **1-3**, **7** and **8** at corresponding excitation/emission maxima.

**Table S1.** Selected Bond Distances (Å) and Angles (°) for Complexes **1-9**

| Complex 1                                    |            |                                |           |
|----------------------------------------------|------------|--------------------------------|-----------|
| O(1)-Zn(1)                                   | 1.9021(18) | N(1)-Zn(1)                     | 2.047(2)  |
| O(1)-Zn(2)                                   | 1.9570(19) | O(3) <sup>#4</sup> -Zn(2)      | 2.409(2)  |
| O(4) <sup>#4</sup> -Zn(2)                    | 1.9002(19) | N(4) <sup>#1</sup> -Zn(2)      | 2.029(2)  |
| N(2)-Zn(2)                                   | 2.107(2)   | O(1)-Zn(1)-N(1)                | 93.02(8)  |
| O(1)-Zn(1)-N(1) <sup>#3</sup>                | 111.86(8)  | N(1)-Zn(1)-N(1) <sup>#3</sup>  | 110.4(12) |
| O(4) <sup>#4</sup> -Zn(2)-O(3) <sup>#4</sup> | 77.53(8)   | O(1)-Zn(2)-O(4) <sup>#4</sup>  | 102.71(8) |
| O(3) <sup>#4</sup> -Zn(2)-N(4) <sup>#1</sup> | 86.39(8)   | O(1)-Zn(2)-N(4) <sup>#1</sup>  | 104.77(9) |
| O(1)-Zn(2)-N(2)                              | 89.96(8)   | O(3) <sup>#4</sup> -Zn(2)-N(2) | 80.22(7)  |
| N(4) <sup>#1</sup> -Zn(2)-N(2)               | 98.93(9)   |                                |           |
| Complex 2                                    |            |                                |           |
| O(1)-Ag(1)                                   | 2.321(5)   | O(3)-Ag(1)                     | 2.532(8)  |
| N(2) <sup>#2</sup> -Ag(1)                    | 2.322(7)   | N(3) <sup>#1</sup> -Ag(1)      | 2.218(7)  |
| O(1)-Ag(1)-N(2) <sup>#2</sup>                | 95.3(2)    | O(1)-Ag(1)-O(3)                | 66.6(2)   |
| N(3) <sup>#1</sup> -Ag(1)-N(2) <sup>#2</sup> | 111.0(2)   | N(3) <sup>#1</sup> -Ag(1)-O(3) | 101.3(3)  |
| Complex 3                                    |            |                                |           |
| O(7)-Co(1)                                   | 2.091(8)   | O(8)-Co(1)                     | 2.030(8)  |
| N(3)-Co(1)                                   | 2.138(8)   | O(7)-Co(1)-O(8) <sup>#1</sup>  | 89.6(3)   |
| O(7)-Co(1)-O(8)                              | 90.4(3)    | O(7)-Co(1)-N(3)                | 91.4(3)   |
| O(7)-Co(1)-N(3) <sup>#1</sup>                | 91.4(3)    | O(8)-Co(1)-N(3) <sup>#1</sup>  | 87.8(3)   |
| O(8)-Co(1)-N(3)                              | 92.2(3)    |                                |           |
| Complex 4                                    |            |                                |           |
| O(3) <sup>#1</sup> -Cu(1)                    | 1.890(9)   | O(4) <sup>#1</sup> -Cu(1)      | 2.281(12) |
| O(12)-Cu(1)                                  | 1.867(9)   | O(13)-Cu(1)                    | 2.58(2)   |
| N(1)-Cu(1)                                   | 2.103(12)  | N(5)-Cu(1)                     | 2.148(11) |
| O(11) <sup>#2</sup> -Cu(2)                   | 1.902(9)   | O(6) <sup>#4</sup> -Cu(2)      | 2.505(12) |
| O(12)-Cu(2)                                  | 1.853(9)   | N(6)-Cu(2)                     | 1.998(11) |
| N(3) <sup>#3</sup> -Cu(2)                    | 1.963(11)  | O(1) <sup>#4</sup> -Cu(3)      | 2.593(14) |
| O(7) <sup>#5</sup> -Cu(3)                    | 2.383(11)  | O(11)-Cu(3)                    | 1.905(10) |
| O(8) <sup>#5</sup> -Cu(3)                    | 1.930(10)  | N(4) <sup>#6</sup> -Cu(3)      | 2.123(12) |

|                                               |           |                                              |           |
|-----------------------------------------------|-----------|----------------------------------------------|-----------|
| N(8)-Cu(3)                                    | 2.076(11) | O(3) <sup>#1</sup> -Cu(1)-O(4) <sup>#1</sup> | 80.4(4)   |
| O(12)-Cu(1)-O(4) <sup>#1</sup>                | 112.7(4)  | O(3) <sup>#1</sup> -Cu(1)-O(13)              | 72.3(6)   |
| O(12)-Cu(1)-O(13)                             | 94.1(6)   | O(12)-Cu(1)-N(1)                             | 89.2(4)   |
| O(3) <sup>#1</sup> -Cu(1)-N(1)                | 93.7(4)   | O(12)-Cu(1)-N(5)                             | 83.6(4)   |
| O(3) <sup>#1</sup> -Cu(1)-N(5)                | 93.0(4)   | O(4) <sup>#1</sup> -Cu(1)-N(1)               | 97.2(5)   |
| O(4) <sup>#1</sup> -Cu(1)-N(5)                | 86.9(4)   | O(13)-Cu(1)-N(1)                             | 93.3(6)   |
| O(13)-Cu(1)-N(5)                              | 85.9(6)   | O(12)-Cu(2)-O(6) <sup>#4</sup>               | 85.6(4)   |
| O(11) <sup>#2</sup> -Cu(2)-O(6) <sup>#4</sup> | 94.4(4)   | O(12)-Cu(2)-N(3) <sup>#3</sup>               | 93.5(4)   |
| O(11) <sup>#2</sup> -Cu(2)-N(3) <sup>#3</sup> | 85.7(4)   | O(12)-Cu(2)-N(6)                             | 84.8(4)   |
| O(11) <sup>#2</sup> -Cu(2)-N(6)               | 96.0(4)   | O(6) <sup>#4</sup> -Cu(2)-N(3) <sup>#3</sup> | 95.4(5)   |
| O(6) <sup>#4</sup> -Cu(2)-N(6)                | 93.1(4)   | O(8) <sup>#5</sup> -Cu(3)-O(7) <sup>#5</sup> | 79.6(4)   |
| O(11)-Cu(3)-O(7) <sup>#5</sup>                | 107.3(4)  | O(11)-Cu(3)-O(1) <sup>#4</sup>               | 88.7(4)   |
| O(1) <sup>#4</sup> -Cu(3)-N(4) <sup>#6</sup>  | 89.7(5)   | O(7) <sup>#5</sup> -Cu(3)-N(8)               | 97.5(4)   |
| O(11)-Cu(3)-N(8)                              | 87.9(4)   | O(8) <sup>#5</sup> -Cu(3)-N(8)               | 91.7(4)   |
| O(11)-Cu(3)-N(4) <sup>#6</sup>                | 86.0(4)   | O(8) <sup>#5</sup> -Cu(3)-N(4) <sup>#6</sup> | 93.7(4)   |
| O(7) <sup>#5</sup> -Cu(3)-N(4) <sup>#6</sup>  | 89.7(4)   | O(1) <sup>#4</sup> -Cu(3)-N(8)               | 84.5(5)   |
| <b>Complex 5</b>                              |           |                                              |           |
| O(7)-Cu(1)                                    | 2.002(10) | N(5)-Cu(1)                                   | 1.942(13) |
| N(14) <sup>#1</sup> -Cu(1)                    | 1.962(12) | N(8)-Cu(1)                                   | 1.979(13) |
| N(15)-Cu(1)                                   | 2.253(13) | O(7)-Cu(2)                                   | 2.016(10) |
| O(16) <sup>#2</sup> -Cu(2)                    | 1.950(9)  | O(6)-Cu(2)                                   | 2.321(11) |
| N(21)-Cu(2)                                   | 1.969(13) | N(4)-Cu(2)                                   | 1.965(12) |
| O(8)-Cu(3)                                    | 1.954(12) | O(7)-Cu(3)                                   | 2.031(10) |
| N(20)-Cu(3)                                   | 1.920(12) | N(9)-Cu(3)                                   | 1.990(12) |
| N(16)-Cu(3)                                   | 2.297(18) | O(11)-Cu(4)                                  | 1.848(14) |
| O(10)-Cu(4)                                   | 2.33(2)   | O(7)-Cu(1)-N(15)                             | 86.3(4)   |
| O(7)-Cu(1)-N(5)                               | 88.1(5)   | O(7)-Cu(1)-N(8)                              | 89.3(5)   |
| N(14) <sup>#1</sup> -Cu(1)-N(8)               | 93.2(5)   | N(5)-Cu(1)-N(14) <sup>#1</sup>               | 88.9(5)   |
| N(5)-Cu(1)-N(15)                              | 96.5(5)   | N(14) <sup>#1</sup> -Cu(1)-N(15)             | 104.0(4)  |
| N(8)-Cu(1)-N(15)                              | 86.3(5)   | O(7)-Cu(2)-O(6)                              | 88.8(4)   |
| O(16) <sup>#2</sup> -Cu(2)-O(6)               | 95.8(4)   | O(6)-Cu(2)-N(21)                             | 99.3(5)   |
| O(16) <sup>#2</sup> -Cu(2)-N(4)               | 93.7(5)   | O(16) <sup>#2</sup> -Cu(2)-N(21)             | 92.2(4)   |
| O(7)-Cu(2)-N(4)                               | 87.0(5)   | O(7)-Cu(2)-N(21)                             | 86.6(4)   |
| O(6)-Cu(2)-N(4)                               | 87.9(5)   | O(8)-Cu(3)-N(16)                             | 101.4(7)  |
| O(7)-Cu(3)-N(16)                              | 85.9(5)   | O(8)-Cu(3)-N(20)                             | 92.9(5)   |
| O(8)-Cu(3)-N(9)                               | 89.1(5)   | O(7)-Cu(3)-N(9)                              | 89.6(5)   |
| O(7)-Cu(3)-N(20)                              | 86.6(5)   | N(9)-Cu(3)-N(16)                             | 91.2(6)   |
| N(20)-Cu(3)-N(16)                             | 102.4(6)  | O(11)-Cu(4)-O(10)                            | 95.9(6)   |
| O(11)-Cu(4)-O(10) <sup>#3</sup>               | 84.1(6)   |                                              |           |
| <b>Complex 6</b>                              |           |                                              |           |
| O(7)-Cu(1)                                    | 1.986(16) | O(8)-Cu(1)                                   | 2.388(15) |
| N(5)-Cu(1)                                    | 2.045(14) | O(8) <sup>#1</sup> -Cu(2)                    | 2.378(14) |
| O(6)-Cu(2)                                    | 1.983(16) | N(4)-Cu(2)                                   | 2.049(15) |
| O(7)-Cu(1)-O(8) <sup>#1</sup>                 | 90.4(5)   | O(7)-Cu(1)-O(8)                              | 89.6(5)   |

|                                                                                                                                                                                                                                                                                                                                                                                                                                                                                                                                                                                                                                                 |            |                                              |            |
|-------------------------------------------------------------------------------------------------------------------------------------------------------------------------------------------------------------------------------------------------------------------------------------------------------------------------------------------------------------------------------------------------------------------------------------------------------------------------------------------------------------------------------------------------------------------------------------------------------------------------------------------------|------------|----------------------------------------------|------------|
| O(7)-Cu(1)-N(5)                                                                                                                                                                                                                                                                                                                                                                                                                                                                                                                                                                                                                                 | 89.0(6)    | O(7)-Cu(1)-N(5) <sup>#1</sup>                | 91.0(6)    |
| O(8)-Cu(1)-N(5)                                                                                                                                                                                                                                                                                                                                                                                                                                                                                                                                                                                                                                 | 95.1(6)    | O(8)-Cu(1)-N(5) <sup>#1</sup>                | 84.9(6)    |
| O(6)-Cu(2)-O(8) <sup>#1</sup>                                                                                                                                                                                                                                                                                                                                                                                                                                                                                                                                                                                                                   | 90.8(5)    | O(6)-Cu(2)-O(8) <sup>#3</sup>                | 89.2(5)    |
| O(6)-Cu(2)-N(4)                                                                                                                                                                                                                                                                                                                                                                                                                                                                                                                                                                                                                                 | 88.8(6)    | O(8) <sup>#3</sup> -Cu(2)-N(4)               | 95.4(6)    |
| O(8) <sup>#1</sup> -Cu(2)-N(4)                                                                                                                                                                                                                                                                                                                                                                                                                                                                                                                                                                                                                  | 84.6(6)    | O(6)-Cu(2)-N(4) <sup>#2</sup>                | 91.2(6)    |
| <b>Complex 7</b>                                                                                                                                                                                                                                                                                                                                                                                                                                                                                                                                                                                                                                |            |                                              |            |
| Ag(1)-O(2) <sup>#2</sup>                                                                                                                                                                                                                                                                                                                                                                                                                                                                                                                                                                                                                        | 2.590(2)   | Ag(1)-O(4)                                   | 2.587(34)  |
| Ag(1)-O(7)                                                                                                                                                                                                                                                                                                                                                                                                                                                                                                                                                                                                                                      | 2.718(33)  | Ag(1)-N(4)                                   | 2.293(16)  |
| Ag(2)-O(3) <sup>#4</sup>                                                                                                                                                                                                                                                                                                                                                                                                                                                                                                                                                                                                                        | 2.541(19)  | Ag(2)-N(5)                                   | 2.188(13)  |
| O(2) <sup>#2</sup> -Ag(1)-N(4)                                                                                                                                                                                                                                                                                                                                                                                                                                                                                                                                                                                                                  | 98.4(4)    | O(3) <sup>#5</sup> -Ag(2)-N(5)               | 113.8(6)   |
| O(3) <sup>#4</sup> -Ag(2)-O(3) <sup>#5</sup>                                                                                                                                                                                                                                                                                                                                                                                                                                                                                                                                                                                                    | 83.3(8)    | O(3) <sup>#4</sup> -Ag(2)-N(5)               | 89.9(6)    |
| <b>Complex 8</b>                                                                                                                                                                                                                                                                                                                                                                                                                                                                                                                                                                                                                                |            |                                              |            |
| Ag(1)-N(6)                                                                                                                                                                                                                                                                                                                                                                                                                                                                                                                                                                                                                                      | 2.140(4)   | Ag(1)-N(12)                                  | 2.160(3)   |
| Ag(2)-N(4)                                                                                                                                                                                                                                                                                                                                                                                                                                                                                                                                                                                                                                      | 2.261(4)   | Ag(2)-N(5) <sup>#2</sup>                     | 2.330(4)   |
| Ag(2)-O(6) <sup>#2</sup>                                                                                                                                                                                                                                                                                                                                                                                                                                                                                                                                                                                                                        | 2.353(3)   | Ag(2)-O(7) <sup>#2</sup>                     | 2.535(5)   |
| Ag(2)-O(5) <sup>#3</sup>                                                                                                                                                                                                                                                                                                                                                                                                                                                                                                                                                                                                                        | 2.576(3)   | Ag(3)-N(9) <sup>#4</sup>                     | 2.174(3)   |
| Ag(3)-N(3)                                                                                                                                                                                                                                                                                                                                                                                                                                                                                                                                                                                                                                      | 2.176(3)   | Ag(4)-N(10)                                  | 2.183(3)   |
| Ag(4)-O(5) <sup>#5</sup>                                                                                                                                                                                                                                                                                                                                                                                                                                                                                                                                                                                                                        | 2.303(3)   | Ag(4)-O(6) <sup>#6</sup>                     | 2.403(3)   |
| Ag(4)-O(11)                                                                                                                                                                                                                                                                                                                                                                                                                                                                                                                                                                                                                                     | 2.503(11)  | N(4)-Ag(2)-N(5) <sup>#2</sup>                | 116.15(12) |
| N(5) <sup>#2</sup> -Ag(2)-O(6) <sup>#2</sup>                                                                                                                                                                                                                                                                                                                                                                                                                                                                                                                                                                                                    | 104.20(13) | N(4)-Ag(2)-O(7) <sup>#2</sup>                | 85.53(15)  |
| N(5) <sup>#2</sup> -Ag(2)-O(7) <sup>#2</sup>                                                                                                                                                                                                                                                                                                                                                                                                                                                                                                                                                                                                    | 116.25(17) | O(6) <sup>#2</sup> -Ag(2)-O(7) <sup>#2</sup> | 67.72(12)  |
| N(4)-Ag(2)-O(5) <sup>#3</sup>                                                                                                                                                                                                                                                                                                                                                                                                                                                                                                                                                                                                                   | 117.83(13) | N(5) <sup>#2</sup> -Ag(2)-O(5) <sup>#3</sup> | 78.30(12)  |
| O(6) <sup>#2</sup> -Ag(2)-O(5) <sup>#3</sup>                                                                                                                                                                                                                                                                                                                                                                                                                                                                                                                                                                                                    | 78.09(11)  | N(10)-Ag(4)-O(11)                            | 103.5(3)   |
| O(6) <sup>#6</sup> -Ag(4)-O(11)                                                                                                                                                                                                                                                                                                                                                                                                                                                                                                                                                                                                                 | 75.5(3)    | O(5) <sup>#5</sup> -Ag(4)-O(6) <sup>#6</sup> | 82.68(11)  |
| <b>Complex 9</b>                                                                                                                                                                                                                                                                                                                                                                                                                                                                                                                                                                                                                                |            |                                              |            |
| O(5)-Cu(1)                                                                                                                                                                                                                                                                                                                                                                                                                                                                                                                                                                                                                                      | 1.921(9)   | O(6)-Cu(1)                                   | 2.013(10)  |
| O(7)-Cu(1)                                                                                                                                                                                                                                                                                                                                                                                                                                                                                                                                                                                                                                      | 2.403(16)  | N(6)-Cu(1)                                   | 1.938(10)  |
| N(4) <sup>#1</sup> -Cu(1)                                                                                                                                                                                                                                                                                                                                                                                                                                                                                                                                                                                                                       | 1.977(10)  | O(6)-Cu(1)-O(7)                              | 92.6(6)    |
| O(5)-Cu(1)-O(7)                                                                                                                                                                                                                                                                                                                                                                                                                                                                                                                                                                                                                                 | 95.0(5)    | O(5)-Cu(1)-N(6)                              | 89.3(4)    |
| O(7)-Cu(1)-N(4) <sup>#1</sup>                                                                                                                                                                                                                                                                                                                                                                                                                                                                                                                                                                                                                   | 90.4(5)    | O(6)-Cu(1)-N(6)                              | 89.4(4)    |
| O(5)-Cu(1)-N(4) <sup>#1</sup>                                                                                                                                                                                                                                                                                                                                                                                                                                                                                                                                                                                                                   | 91.6(4)    | O(7)-Cu(1)-N(6)                              | 100.8(5)   |
| O(6)-Cu(1)-N(4) <sup>#1</sup>                                                                                                                                                                                                                                                                                                                                                                                                                                                                                                                                                                                                                   | 88.1(4)    |                                              |            |
| Symmetry codes, for <b>1</b> : #1 -x+3/2,y-1/2,-z+3/2; #2 x-1/2,-y+1/2,z-1/2; #3 -x+1,y,-z+3/2; #4 x+1/2,-y+1/2,z+1/2; for <b>2</b> : #1 -x+3/2,-y+3/2,-z+1; #2 x,y-1,z; for <b>4</b> : #1 -x,-y,-z+2; #2 -x,-y+1,-z+1; #3 -x-1,-y,-z+1; #4 -x,-y+1,-z+2; #5 -x+1,-y+1,-z+2; #6 x+1,y+1,z; for <b>5</b> : #1 -x+2,-y,-z; #2 -x+1,-y,-z; #3 -x+3,-y,-z+1; for <b>6</b> : #1 -x+1,-y,-z; #2 -x,-y,-z; #3 x-1,y,z; for <b>7</b> : #1 -x+1/2,y,z; #2 -x+1,-y+1,z; #3 -x+1,-y+2,z; #4 x,y+1/2,z+1/2; #5 -x+1,-y+3/2,z+1/2; for <b>8</b> : #2 -x,-y+2,-z+1; #3 x-1,y,z; #4 x,y,z+1; #5 x,y,z-1; #6 -x+1,-y+2,-z; for <b>9</b> : #1 -x+1/2,y-1/2,-z+0. |            |                                              |            |

**Table S2.** Intermolecular  $\pi$ - $\pi$  interactions in **3**

| ring(I)→ring(J)           | Distance between ring Centroids (I,J), (Å) | dihedral angle (I,J), (deg) | Perpendicular distance of centroid(I) on ring (J), (Å) |
|---------------------------|--------------------------------------------|-----------------------------|--------------------------------------------------------|
| Cg(1)→Cg(1) <sup>i</sup>  | 3.625(7)                                   | 0                           | 3.279(5)                                               |
| Cg(1)→Cg(1) <sup>ii</sup> | 3.716(7)                                   | 0                           | 3.385(5)                                               |

Symmetry code: i = 1-X,1-Y,1-Z; ii = 2-X,1-Y,1-Z.

Cg(I)/Cg(J) denotes the I/J ring in the corresponding structure: Cg(1) = C2/C3/C4/C5/C6/C7.
